# Supplementary material for: Non-invasive detection of bilirubin concentrations during the first week of life in a low-resource setting along the Thailand-Myanmar border
Source: bioRxiv or medRxiv preprint supplement (doi:10.1101/2024.05.06.24306917), 2024-05-08
Supplement: Supplementary file [file media-1.pdf]

## Supplementary Material

### Excluded TcB-TSB paired data points

A total of 6 data points were excluded (circled in blue) from analyses based on the longitudinal data trends as shown in Figure S3.

From the top pane, in the first participant the TSB#4 was probably a reporting mistake; in the second participant, samples #4 and #5 were collected at 5am and 8:40am, we suspect that TSB#4 and TcB#5 could be reporting mistakes. In the third participant, TSB#1 was 35 umol/L with hct=73% while TSB#2 (collected 2hrs later) was 106umol/L with hct=62% therefore we suspected a problem in the sample used for TSB#1 test. In the fourth participant, the two TcB records were exchanged in the logbook but we could not confirm the correct result.

Figure S1. Excluded paired TSB-TcB data points

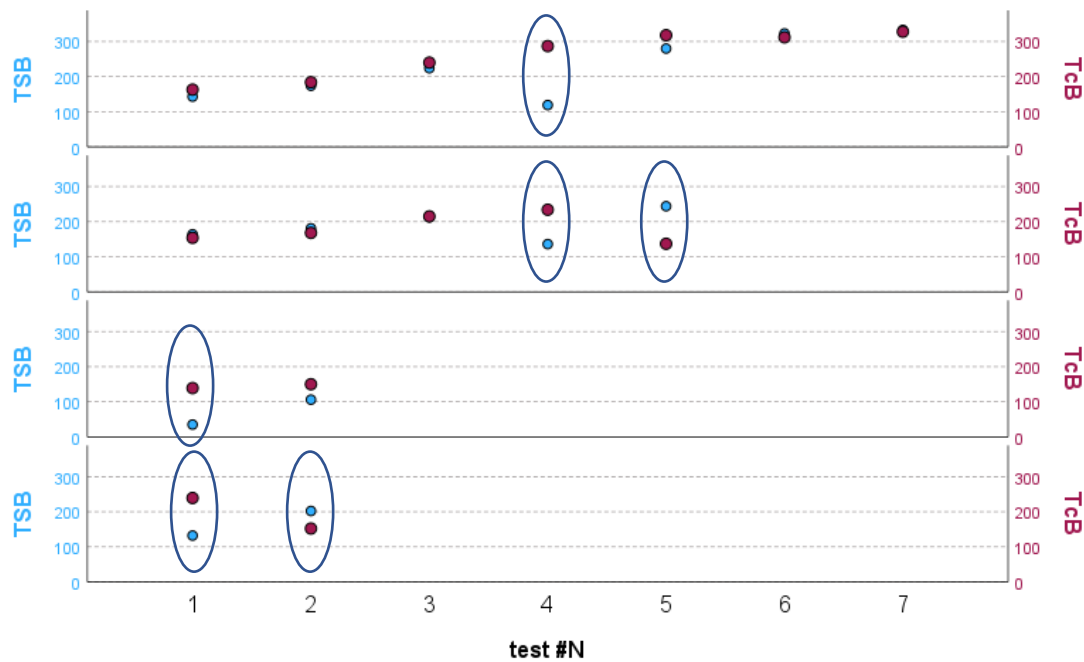

**Table S1. Mean difference TcB-TSB for consecutive TSB tests**

| TSB             | N   | Mean Difference TcB-TSB | Lower LoA | Upper LoA |
|-----------------|-----|-------------------------|-----------|-----------|
| 1 <sup>st</sup> | 296 | 19.8                    | -36.4     | 76.0      |
| 2 <sup>nd</sup> | 211 | 25.6                    | -40.0     | 91.3      |
| 3 <sup>rd</sup> | 87  | 19.5                    | -48.0     | 87.0      |
| 4 <sup>th</sup> | 43  | 17.8                    | -59.9     | 95.5      |
| 5 <sup>th</sup> | 26  | 15.8                    | -42.3     | 74.0      |
| 6 <sup>th</sup> | 13  | 4.5                     | -55.2     | 64.1      |
| 7 <sup>th</sup> | 5   | -14.0                   | -53.7     | 25.7      |
| 8 <sup>th</sup> | 3   | -34.0                   | -126.7    | 58.7      |
| 9 <sup>th</sup> | 1   | 0.0                     |           |           |
| Total           | 685 | 20.5                    | -42.7     | 83.6      |

**Table S2. Sensitivity and specificity of TcB without and with correction at different bilirubin thresholds in all samples**

| TSB threshold | Sensitivity TcB without correction | Specificity TcB without correction | Sensitivity TcB with correction | Specificity TcB with correction |
|---------------|------------------------------------|------------------------------------|---------------------------------|---------------------------------|
| ≥100          | 0.97                               | 0.50                               | 1.00                            | 0.20                            |
| ≥150          | 0.96                               | 0.69                               | 0.99                            | 0.48                            |
| ≥175          | 0.94                               | 0.78                               | 0.98                            | 0.64                            |
| ≥200          | 0.95                               | 0.84                               | 0.99                            | 0.73                            |
| ≥225          | 0.95                               | 0.87                               | 0.96                            | 0.79                            |
| ≥250          | 0.88                               | 0.88                               | 0.98                            | 0.83                            |
| ≥275          | 0.78                               | 0.93                               | 0.88                            | 0.87                            |
| ≥300          | 0.72                               | 0.95                               | 0.90                            | 0.91                            |

**Table S3. Performance of the TcB+20 at different bilirubin thresholds by clinic**

| All clinics | Threshold (umol/L) | N (TcB≥ threshold) | Sensitivity | Specificity | PPV  | NPV  |
|-------------|--------------------|--------------------|-------------|-------------|------|------|
|             | ≥100               | 661                | 1.00        | 0.20        | 0.86 | 0.92 |
|             | ≥150               | 517                | 0.99        | 0.48        | 0.65 | 0.97 |
|             | ≥175               | 413                | 0.98        | 0.64        | 0.63 | 0.98 |
|             | ≥200               | 328                | 0.99        | 0.73        | 0.60 | 1.00 |
|             | ≥225               | 250                | 0.96        | 0.79        | 0.55 | 0.99 |
|             | ≥250               | 188                | 0.98        | 0.83        | 0.46 | 1.00 |
|             | ≥275               | 134                | 0.88        | 0.87        | 0.38 | 0.99 |
|             | ≥300               | 84                 | 0.90        | 0.91        | 0.31 | 1.00 |

|     |      |     |      |      |      |      |
|-----|------|-----|------|------|------|------|
| WPA |      |     |      |      |      |      |
|     | ≥100 | 235 | 1.00 | 0.09 | 0.83 | 1.00 |
|     | ≥150 | 195 | 0.99 | 0.32 | 0.52 | 0.98 |
|     | ≥175 | 156 | 0.99 | 0.51 | 0.49 | 0.99 |
|     | ≥200 | 117 | 1.00 | 0.65 | 0.43 | 1.00 |
|     | ≥225 | 90  | 1.00 | 0.71 | 0.33 | 1.00 |
|     | ≥250 | 70  | 1.00 | 0.75 | 0.21 | 1.00 |
|     | ≥275 | 50  | 1.00 | 0.81 | 0.12 | 1.00 |
|     | ≥300 | 30  | NA   | NA   | NA   | NA   |
| MKT |      |     |      |      |      |      |
|     | ≥100 | 426 | 0.99 | 0.27 | 0.87 | 0.91 |
|     | ≥150 | 322 | 0.98 | 0.58 | 0.72 | 0.97 |
|     | ≥175 | 257 | 0.97 | 0.72 | 0.72 | 0.97 |
|     | ≥200 | 211 | 0.99 | 0.79 | 0.70 | 1.00 |
|     | ≥225 | 160 | 0.96 | 0.84 | 0.67 | 0.98 |
|     | ≥250 | 118 | 0.97 | 0.88 | 0.61 | 0.99 |
|     | ≥275 | 84  | 0.87 | 0.90 | 0.54 | 0.98 |
|     | ≥300 | 54  | 0.90 | 0.93 | 0.48 | 0.99 |

PPV= positive predictive value; NPV=negative predictive value

**Table S4. Performance of corrected TcB thresholds over time**

|     | MKT clinic          |      |      | WPA clinic          |    |      |                     |      |      |                     |    |      |
|-----|---------------------|------|------|---------------------|----|------|---------------------|------|------|---------------------|----|------|
|     | 2020                |      |      | 2021                |    |      | 2022                |      |      | 2023                |    |      |
| ALL | N (TcB>= threshold) | se   | sp   | N (TcB>= threshold) | se | sp   | N (TcB>= threshold) | se   | sp   | N (TcB>= threshold) | se | sp   |
| 150 | 321                 | 0.98 | 0.58 | 8                   | 1  | 0.33 | 147                 | 0.99 | 0.32 | 39                  | 1  | 0.26 |
| 200 | 210                 | 0.99 | 0.79 | 5                   | 1  | 0.63 | 85                  | 1    | 0.65 | 26                  | 1  | 0.62 |
| 250 | 117                 | 0.97 | 0.88 | 2                   | 1  | 0.89 | 49                  | 1    | 0.77 | 18                  | 1  | 0.68 |
| 300 | 53                  | 0.89 | 0.93 | 2                   | NA | NA   | 18                  | NA   | NA   | 10                  | NA | NA   |

Figure S2. Examples of longitudinal course of repeated paired TcB-capillary TSB tests in different neonates (1 neonate per pane).

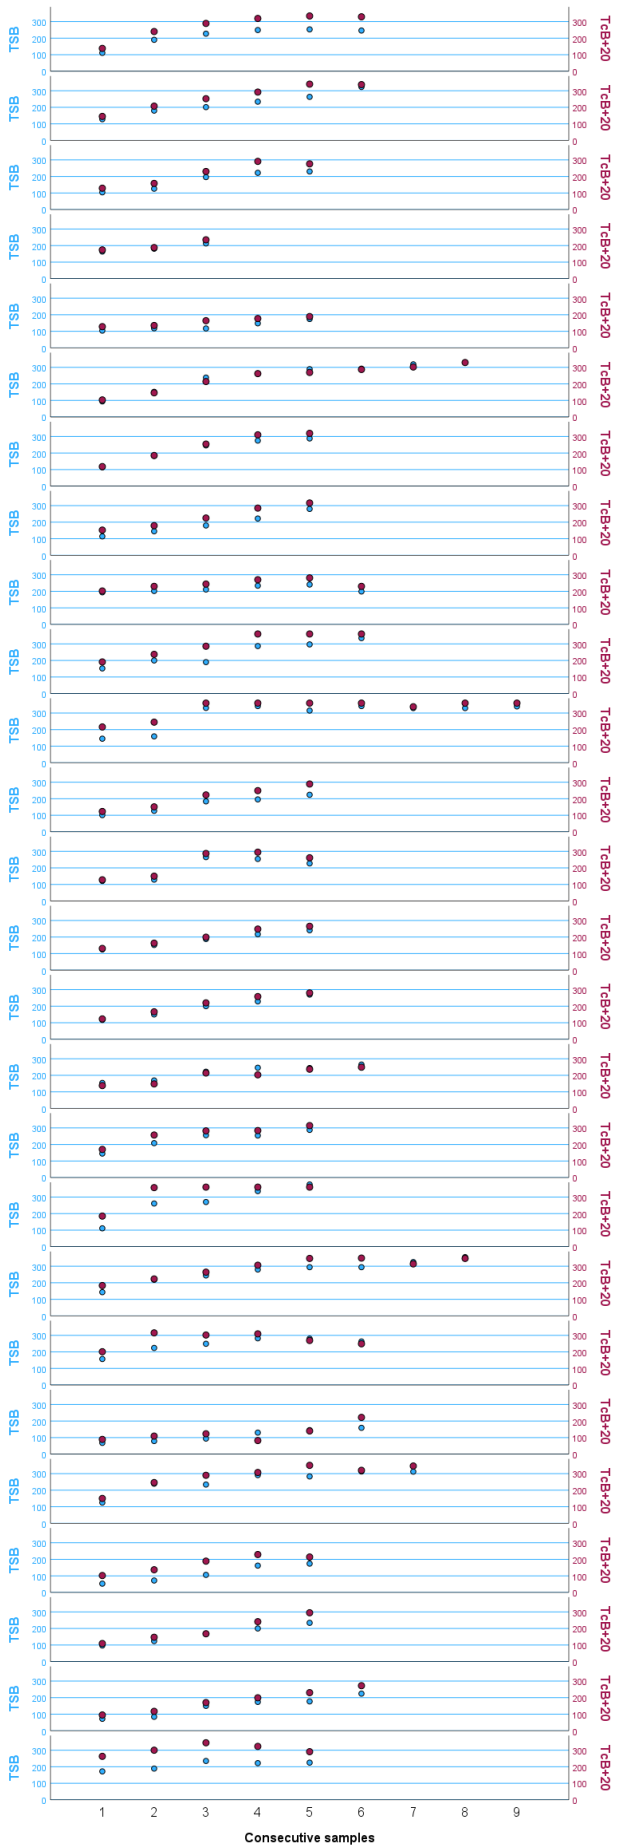

**Figure S2. Distribution of TSB in cord blood by clinical site**

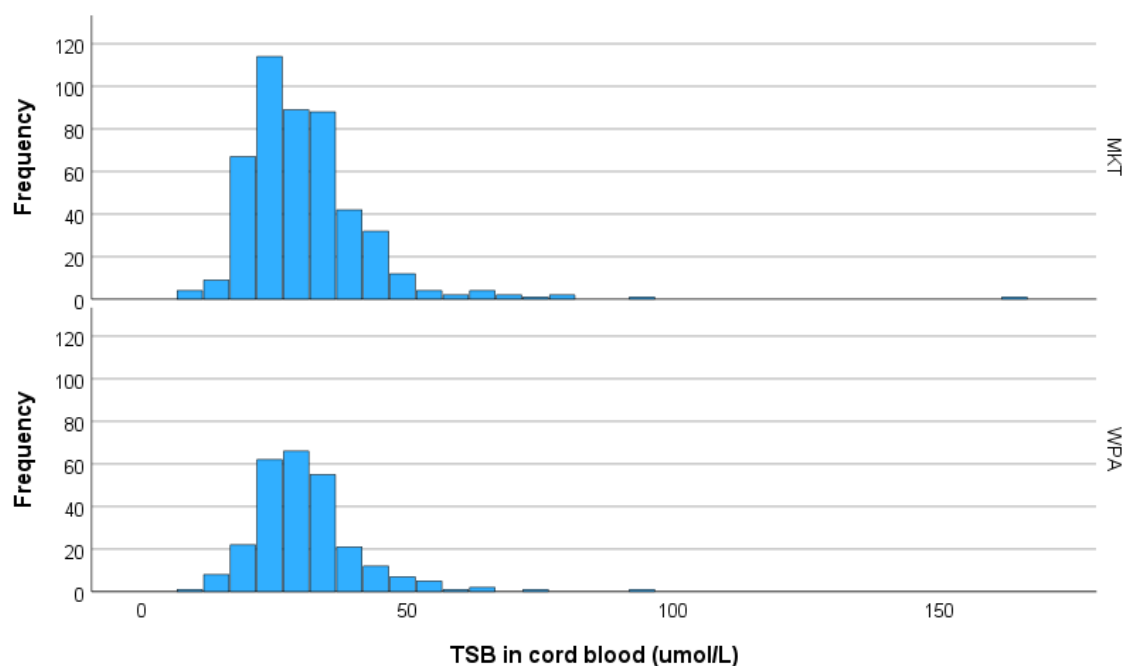

**Table S5. Diagnostic performance of cord blood TSB thresholds for identification of NH**

| Threshold   | Population        | Reference | Sensitivity | Specificity |
|-------------|-------------------|-----------|-------------|-------------|
| >32.0umol/L | All neonates      | (1)       | 67.4%       | 73.1%       |
| >32.0umol/L | Only EGA≥38 weeks | (1)       | 77.3%       | 72.5%       |
| >35.0umol/L | Only EGA≥38 weeks | (2)       | 71.2%       | 80.3%       |

### References

1. Guan H, Li H, Luo J, Lin L, Wang Y, Xiao Y, et al. Early predictive value of cord blood bilirubin and dynamic monitoring of transcutaneous bilirubin for hyperbilirubinemia of newborns. *Saudi J Biol Sci.* 2017;24(8):1879-83.
2. Jones KDJ, Grossman SE, Kumaranayakam D, Rao A, Fegan G, Aladangady N. Umbilical cord bilirubin as a predictor of neonatal jaundice: a retrospective cohort study. *BMC pediatrics.* 2017;17(1):186.
